# Supplementary material
Source: publisher figshare collection journal article supplement (https://sage.figshare.com/ndownloader/files/18027995)
Supplement: Supplementary file 1 [file 18027995]

## ONLINE APPENDIX (SUPPLEMENTAL)

### APPENDIX 1: STATISTICAL TESTS

If we treat the observed first digits as a set of unordered categories, the Pearson chi-squared test is appropriate. However, this test neglects the fact that the categories are ordered. The Kolmogorov-Smirnov test is well-known and often employed in Benford studies. It accounts for the ordering of the Benford distribution and tests the equality of an empirical distribution with a specified continuous distribution. The test is nonparametric when applied to continuous distributions. However, because the null (Benford) distribution is discrete, Kolmogorov-Smirnov p-values are conservative and depend on the parameters of the null distribution (Conover, 1972). We therefore use the modified Kolmogorov-Smirnov test (Joensuu, 2015). To avoid numerical instability issues, we use empirically simulated standard errors. The modified Kolmogorov-Smirnov test is powerful when there is a large violation of Benford's Law over a small portion of the support (range of possible values) of the statistical distribution and less powerful for small deviations spread throughout the support. This is because the test statistic is based on whichever digit has the largest deviation between empirical and null distributions, rather than combining the deviations of all digits.

Although the modified Kolmogorov-Smirnov test accounts for the ordering of the digits, it does not account for the circularity of this ordering. If we increase the value of a number with first digit 9, the result is a number with one more digit and a leading digit of 1. The digit 2 is to the right of the digit 1, the digit 3 is to the right of 2, ..., and the digit 1 is to the right of 9. The Freedman-Watson  $U^2$  test is specifically designed for distributions with a circular support. The  $U^2$  statistic does not depend on labeling the minimum of a support, because there is no minimum on a circle. This is unlike the Kolmogorov-Smirnov test, which relies on cumulative distributions that would be different if we started with a 2 or a 3. In addition, the  $U^2$  test incorporates all the

## ONLINE APPENDIX (SUPPLEMENTAL)

deviations in frequencies of digits, not just the largest deviation. The continuous Watson  $U^2$  test is known to be more powerful than the continuous Kolmogorov-Smirnov test when the deviations from Benford's frequencies are spread throughout the support. Analytic results are not available for the discrete versions, but Monte Carlo simulations by Lesperance et al. (2016) find that the Freedman-Watson  $U^2$  test is more powerful than Pearson chi-square and Kolmogorov-Smirnov tests (except when deviations are expected to be concentrated on larger values of the first significant digit and then Pearson's chi-square statistic is superior). Because we have no prior beliefs on the distribution of deviations, we prefer the  $U^2$  test whenever the results of the three tests differ.

In light of the false-positive problem discussed in the text, statistical power may seem undesirable. But the false-positive problem is not due to tests being too powerful, it is due to the fact that the ideal null hypothesis would incorporate finite sample divergence from the Benford distribution.

## ONLINE APPENDIX (SUPPLEMENTAL)

### APPENDIX 2: CALCULATION OF EXCESS MAD

Barney and Schulzke (2016) report the formula for calculating the expected value of MAD as a function of the number of records  $N$  for the first-two-digits case. Making the appropriate adjustments for the first-digit case, this becomes:

$$E(MAD) = \sum_{k=1}^9 \sum_{j=0}^N \binom{N}{j} (p_k)^j (1 - p_k)^{N-j} \frac{|(j/N) - p_k|}{9}$$

where:  $p_k = \log_{10}(1 + 1/k)$

We calculated  $E(MAD)$  for  $N = 100, 105, 110, \dots, 175, 200, 250, 300, 350, 400, 450$ , and  $500$ , then, following Barney and Schulzke, interpolated all other values by estimating the following regression line:

$$E(MAD) = 0.0590815 - 0.0079092 \ln(N)$$

Plots of fitted values for  $E(MAD)$  and residuals against  $N$  appear as Figure A2.1 and A2.2, respectively, indicating an excellent fit to the calculated values ( $\bar{R}^2 = 0.9898$ ). Then, EXMAD was generated for each organization as:

$$EXMAD_j = \text{Max}\{(MAD_j - E(\widehat{MAD}|N_j)), 0\}.$$

## ONLINE APPENDIX (SUPPLEMENTAL)

Figure A2.1: Fitted Values of EXMAD

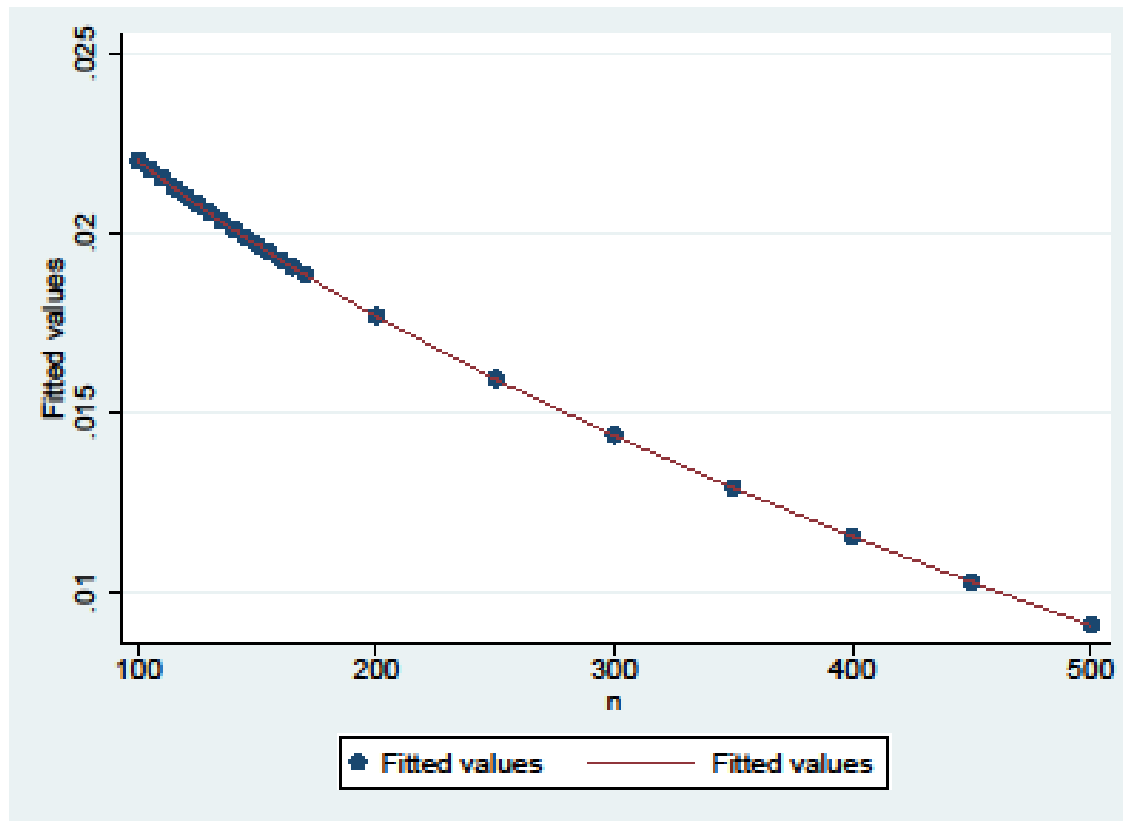

## ONLINE APPENDIX (SUPPLEMENTAL)

Figure A2.2: Fitted minus Actual E(MAD)

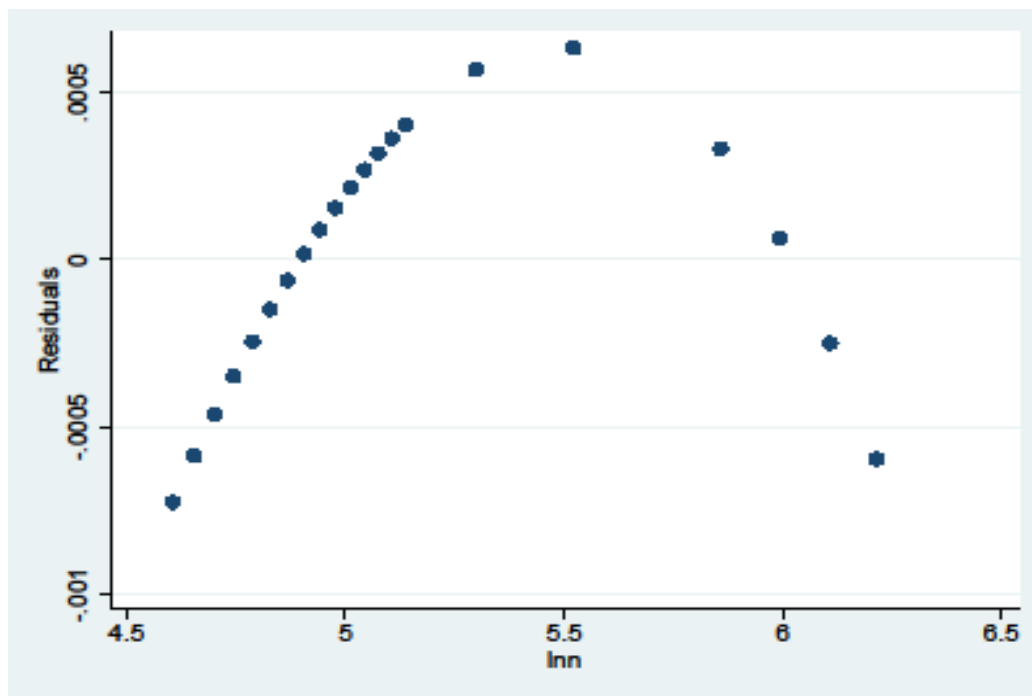

## ONLINE APPENDIX (SUPPLEMENTAL)

### APPENDIX 3: TOBIT RESULTS

|                                  | Coefficients   | Marginal Effects |
|----------------------------------|----------------|------------------|
| Accrual accounting               | 0.0000141      | 0.0000           |
|                                  | (0.05)         | (0.05)           |
| Accounting fees                  | -0.000514**    | -0.0004**        |
|                                  | (-1.93)        | (-1.93)          |
| Paid officers                    | -0.00157****   | -0.0013****      |
|                                  | (-7.17)        | (-7.18)          |
| Reported 0 fundraising           | -0.000106      | -0.0001          |
|                                  | (-0.51)        | (-0.51)          |
| Reported 0 management            | 0.000164       | 0.0001           |
|                                  | (0.57)         | (0.57)           |
| Received government grants       | -0.000787****  | -0.0007****      |
|                                  | (-3.86)        | (-3.86)          |
| Received indirect public support | -0.000599***   | -0.0005***       |
|                                  | (-2.88)        | (-2.88)          |
| Reported donor restricted funds  | -0.000413**    | -0.0004**        |
|                                  | (-1.86)        | (-1.86)          |
| Age                              | 0.0000624****  | 0.0001****       |
|                                  | (9.52)         | (9.54)           |
| Average total assets (log)       | 0.000753****   | 0.0006****       |
|                                  | (11.47)        | (11.51)          |
| Number of observations           | -0.0000443**** | -0.00004****     |
|                                  | (-16.74)       | (-16.85)         |
| Number of annual reports         | 0.00224****    | 0.0019****       |
|                                  | (12.59)        | (12.66)          |
| Constant                         | -0.00348**     |                  |
|                                  | (-2.72)        |                  |
| sigma_cons                       | 0.00944****    |                  |
|                                  | (109.49)       |                  |

## ONLINE APPENDIX (SUPPLEMENTAL)

Dependent variable is EXMAD, left-censored at zero. N=10889 of which 1,213 observations are left-censored. Coefficients for 27 NTEE subsectors not displayed. Significance levels account for hypotheses: we test the one-sided hypothesis that the coefficient is positive for reported zero fundraising and management costs and the one-sided hypothesis that the coefficient is negative for grants, indirect costs, and donor-restricted funds. All other tests are two-sided. *t* statistics in parentheses. Average marginal effects are for the observable dependent variable conditional on the latent variable being positive

\*  $p < 0.10$ , \*\*  $p < 0.05$ , \*\*\*  $p < 0.01$ , \*\*\*\*  $p < 0.001$

## ONLINE APPENDIX (SUPPLEMENTAL)

### APPENDIX 4: FORM 990 VARIABLES INCLUDED IN BENFORD ANALYSIS

| Line on Form 990      | Variables included in Benford analysis                                          | Note                                                                |
|-----------------------|---------------------------------------------------------------------------------|---------------------------------------------------------------------|
| <b>Part I Revenue</b> |                                                                                 |                                                                     |
| 1a                    | Direct public support                                                           |                                                                     |
| 1b                    | Indirect public support                                                         |                                                                     |
| 1c                    | Government contributions                                                        |                                                                     |
| 1d                    | <i>Total contributions (add lines 1a through 1c)</i>                            | <i>Included only when 1a-1c were 0 and 1d was positive</i>          |
| 2                     | Program service revenue                                                         |                                                                     |
| 3                     | Membership dues and assessments                                                 |                                                                     |
| 4                     | Interest on savings and temporary cash investments                              |                                                                     |
| 5                     | Dividends and interest from securities                                          |                                                                     |
| 6a                    | Gross rents                                                                     |                                                                     |
| 6b                    | Less: rental expenses                                                           |                                                                     |
| 6c                    | <i>Net rental income or (loss) (subtract line 6b from line 6a)</i>              | <i>Included only when 6a-6b were 0 and 6c was positive</i>          |
| 7                     | Other investment income                                                         |                                                                     |
| 8a (A)                | Gross amount from sales of assets other than inventory; securities              |                                                                     |
| 8b (A)                | Less: cost or other basis and sales expenses; securities                        |                                                                     |
| 8c (A)                | <i>Gain or (loss); securities</i>                                               | <i>Included only when 8a(A)-8b(A) were 0 and 8c(A) was positive</i> |
| 8a (B)                | Gross amount from sales of assets other than inventory, other                   |                                                                     |
| 8b (B)                | Less: cost or other basis and sales expenses; other                             |                                                                     |
| 8c(B)                 | <i>Gain or (loss); other</i>                                                    | <i>Included only when 8a(B)-8b(B) were 0 and 8c(B) was positive</i> |
| 9a                    | Special events and activities: Gross revenue                                    |                                                                     |
| 9b                    | Less: direct expenses other than fundraising expenses                           |                                                                     |
| 9c                    | <i>Net income or (loss) from special events (subtract line 9b from line 9a)</i> | <i>Included only when 9a-9b were 0 and 9c was positive</i>          |
| 10a                   | Gross sales of inventory, less returns and allowances                           |                                                                     |
| 10b                   | Less: cost of goods sold                                                        |                                                                     |



## ONLINE APPENDIX (SUPPLEMENTAL)

|                                                                                     |                                                                                     |                                                        |
|-------------------------------------------------------------------------------------|-------------------------------------------------------------------------------------|--------------------------------------------------------|
| 10c                                                                                 | Gross profit or (loss) from sales of inventory<br>(subtract line 10b from line 10a) | Included only when 10a-10b were 0 and 10c was positive |
| 11                                                                                  | Other revenue                                                                       |                                                        |
| <b>Part II Functional Expenses (Column B Program services only)</b>                 |                                                                                     |                                                        |
| 22                                                                                  | Grants and allocations                                                              |                                                        |
| 23                                                                                  | Specific assistance to individuals                                                  |                                                        |
| 24                                                                                  | Benefits paid to or for members                                                     |                                                        |
| 25                                                                                  | Compensation of officers, directors, etc.                                           |                                                        |
| 26                                                                                  | Other salaries and wages                                                            |                                                        |
| 27                                                                                  | Pension plan contributions                                                          |                                                        |
| 28                                                                                  | Other employee benefits                                                             |                                                        |
| 29                                                                                  | Payroll taxes                                                                       |                                                        |
| 30                                                                                  | Professional fundraising fees                                                       |                                                        |
| 31                                                                                  | Accounting fees                                                                     |                                                        |
| 32                                                                                  | Legal fees                                                                          |                                                        |
| 33                                                                                  | Supplies                                                                            |                                                        |
| 34                                                                                  | Telephone                                                                           |                                                        |
| 35                                                                                  | Postage and shipping                                                                |                                                        |
| 36                                                                                  | Occupancy                                                                           |                                                        |
| 37                                                                                  | Equipment rental and maintenance                                                    |                                                        |
| 38                                                                                  | Printing and publications                                                           |                                                        |
| 39                                                                                  | Travel                                                                              |                                                        |
| 40                                                                                  | Conferences, conventions, and meetings                                              |                                                        |
| 41                                                                                  | Interest                                                                            |                                                        |
| 42                                                                                  | Depreciation, depletion, etc. (attach schedule)                                     |                                                        |
| 43                                                                                  | Other expenses (itemize)                                                            |                                                        |
| 44                                                                                  | Total functional expenses                                                           | Included only when 22-43 were 0 and 44 were positive   |
| <b>Part IV Balance Sheets: Column (A) Beginning of year, Column (B) End of year</b> |                                                                                     |                                                        |
| 45                                                                                  | Cash—non-interest-bearing                                                           |                                                        |
| 46                                                                                  | Savings and temporary cash investments                                              |                                                        |
| 47                                                                                  | Accounts receivable                                                                 |                                                        |
| 48                                                                                  | Pledges receivable                                                                  |                                                        |
| 49                                                                                  | Grants receivable                                                                   |                                                        |
| 50                                                                                  | Receivables from officers, directors, trustees, and key employees                   |                                                        |
| 51                                                                                  | Other notes and loans receivable                                                    |                                                        |
| 52                                                                                  | Inventories for sale or use                                                         |                                                        |

**ONLINE APPENDIX (SUPPLEMENTAL)**

|    |                                                                   |  |
|----|-------------------------------------------------------------------|--|
| 53 | Prepaid expenses and deferred charges                             |  |
| 54 | Investments—securities                                            |  |
| 55 | Investments—Land, buildings, and equipment                        |  |
| 56 | Investments—other                                                 |  |
| 57 | Land, buildings, and equipment                                    |  |
| 58 | Other assets                                                      |  |
| 60 | Accounts payable and accrued expenses                             |  |
| 61 | Grants payable                                                    |  |
| 62 | Deferred revenue                                                  |  |
| 63 | Loans from officers, directors, trustees, and key employees       |  |
| 64 | Tax-exempt bond liabilities                                       |  |
| 65 | Other liabilities                                                 |  |
| 67 | Unrestricted                                                      |  |
| 68 | Temporarily restricted                                            |  |
| 69 | Permanently restricted                                            |  |
| 70 | Capital stock, trust principal, or current funds                  |  |
| 71 | Paid-in or capital surplus, or land, building, and equipment fund |  |
| 72 | Retained earnings, endowment, accumulated income, or other funds  |  |

Excluded line items that involve adding or subtracting other line items, such as total revenue, total expenses, excess or (deficit) for the year, net assets or fund balances of beginning of year, other changes in net assets or fund balances, net assets or fund balances at end of year, total functional expenses on program services, management and general, and fundraising, and total assets and total liabilities beginning of year and end of year. Excluded detailed functional expenses on management and fundraising and kept only those on program expenses.
